# Supplementary material
Source: publisher site journal article supplement (https://www.spandidos-publications.com/7117/downloadSupplementary)

Figure S1. Thyroid ultrasound indicated a solid nodule in the left lobe of the thyroid gland near the isthmus, which is classified as ACRTI-RADS grade 4. A mixed cystic and solid nodule was present in the right lobe of the thyroid gland, which was classified as ACRTI-RADS grade 2. (A) Multiple mixed cystic and solid nodules are visible in the right lobe of the thyroid, with the largest one measuring  $\sim 3.9 \times 2.7$  mm (red rectangular shape). The internal echoes are uneven, the margins are distinct and the aspect ratio is  $< 1$ . (B) CDFI: No significant blood flow signals are detected within the nodule. (C) In the left lobe of the thyroid near the isthmus, a low-echo solid nodule is visible, measuring  $\sim 4.1 \times 3.1$  mm (red diamond shape). The internal echoes are uneven, with punctate strong echoes visible inside, the margin is blurred and the aspect ratio is  $< 1$ . (D) CDFI: No significant blood flow signals are detected within the nodule. ACRTI-RADS, American College of Radiology Thyroid Imaging Reporting and Data System; CDFI, color doppler flow imaging.

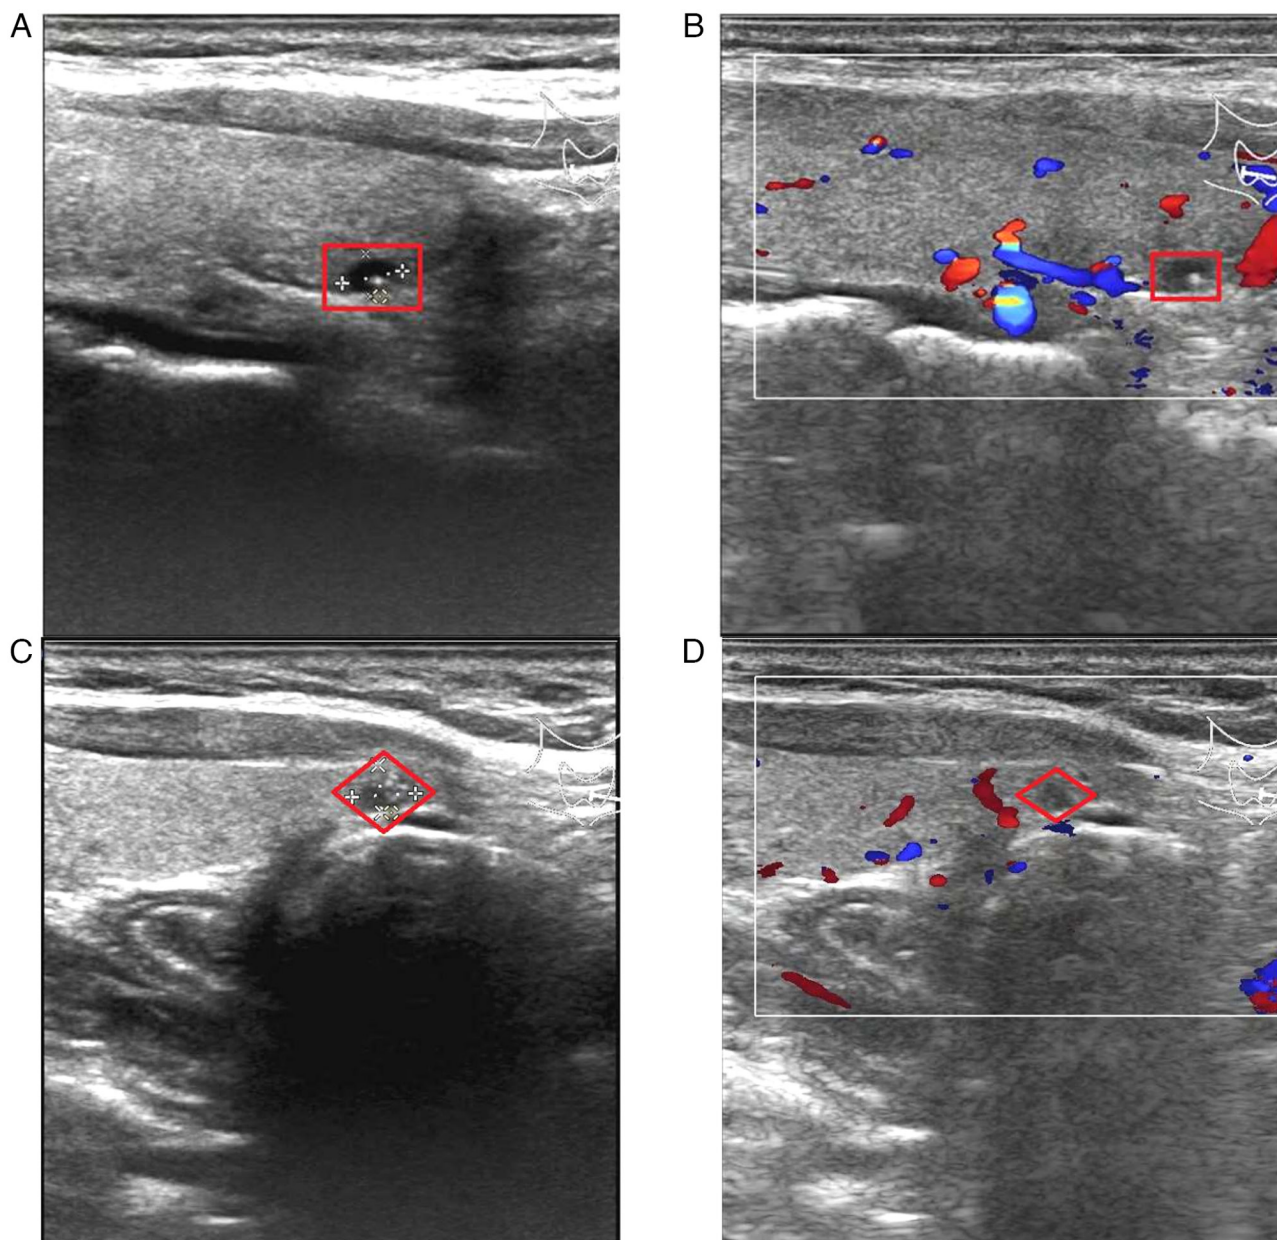

Supplement: Supplementary file 1 [file downloadSupplementary]
